# Supplementary material for: Visible-light sensitive Cu(ii)–TiO2with sustained anti-viral activity for efficient indoor environmental remediation
Source: Royal Society of Chemistry journal article supplement (doi:10.1039/c5ta03756e), 2015-01-01
Supplement: c5ta03756e1.pdf [file c5ta03756e1.pdf]

## Electronic Supplementary Information

# Visible-light sensitive Cu(II)-TiO<sub>2</sub> with sustained anti-viral activity for efficient indoor environment remediation

*Min Liu,<sup>b</sup> Kayano Sunada,<sup>b</sup> Kazuhito Hashimoto,<sup>\*, b, c</sup> Masahiro Miyauchi,<sup>\*, a, d</sup>*

<sup>a</sup>Department of Metallurgy and Ceramics Science, Graduate School of Science and Engineering, Tokyo Institute of Technology, 2-12-1 Ookayama, Meguro-ku, Tokyo 152-8552, Japan.

<sup>b</sup>Research Center for Advanced Science and Technology, The University of Tokyo, 4-6-1 Komaba, Meguro-ku, Tokyo 153-8904, Japan.

<sup>c</sup>Graduate School of Engineering, The University of Tokyo, 7-3-1 Hongo, Bunkyo-ku, Tokyo 113-8656, Japan.

<sup>d</sup>Japan Science and Technology Agency (JST), 4-1-8 Honcho Kawaguchi, Saitama 332-0012, Japan.

**Table S1.** ICP measurement of Cu(II)-TiO<sub>2</sub> (950-HCl) with different pH value.

| Samples                        | Cu(II)-TiO <sub>2</sub> (950-HCl) |       |       |       |       |       |
|--------------------------------|-----------------------------------|-------|-------|-------|-------|-------|
| Grafting pH value              | 2                                 | 4     | 7     | 10    | 12    | 14    |
| Initial amount of Cu(II) (wt%) | 0.1                               | 0.1   | 0.1   | 0.1   | 0.1   | 0.1   |
| Measured Cu(II) (wt%)          | 0.002                             | 0.006 | 0.011 | 0.018 | 0.089 | 0.101 |

**Table S2.** ICP measurement of Cu(II)-TiO<sub>2</sub> (950-HCl-12) with different initial amount of Cu(II).

| Samples                        | Cu(II)-TiO <sub>2</sub> (with acid treatment) |       |       |       |
|--------------------------------|-----------------------------------------------|-------|-------|-------|
| Initial amount of Cu(II) (wt%) | 0.05                                          | 0.1   | 0.25  | 0.5   |
| Measured Cu(II) (wt%)          | 0.037                                         | 0.089 | 0.203 | 0.476 |

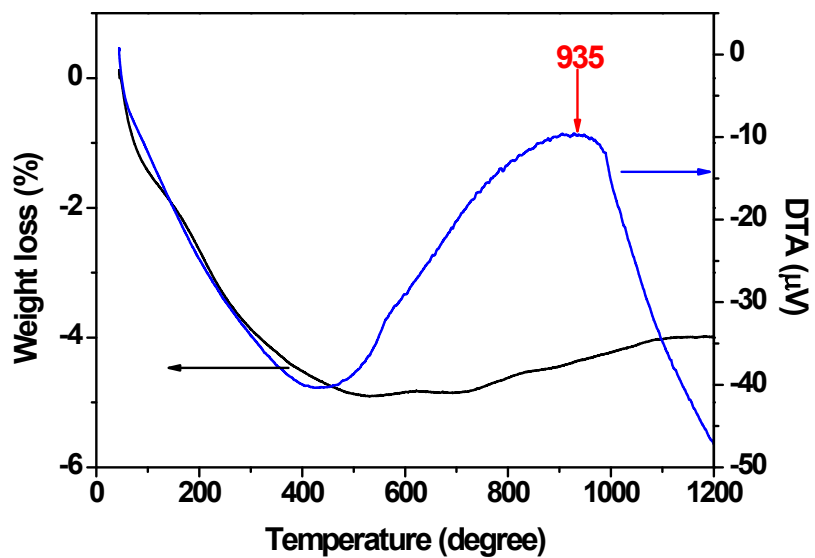

**Figure S1.** TG-DTA curves of  $\text{TiO}_2$  powders.

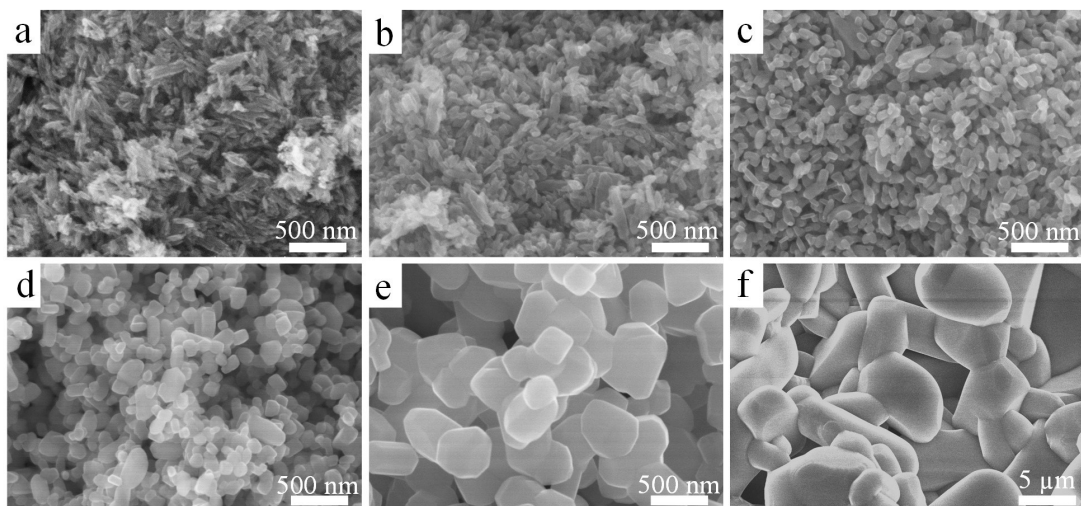

**Figure S2.** SEM images of  $\text{TiO}_2$  samples obtained at different temperature.

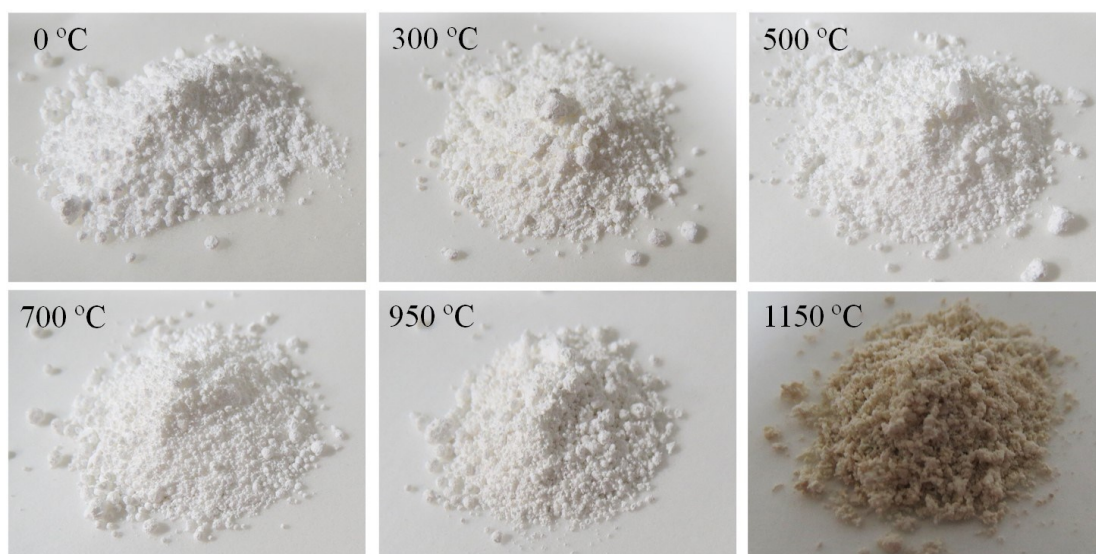

**Figure S3.** Images of  $\text{TiO}_2$  samples obtained at different temperatures.

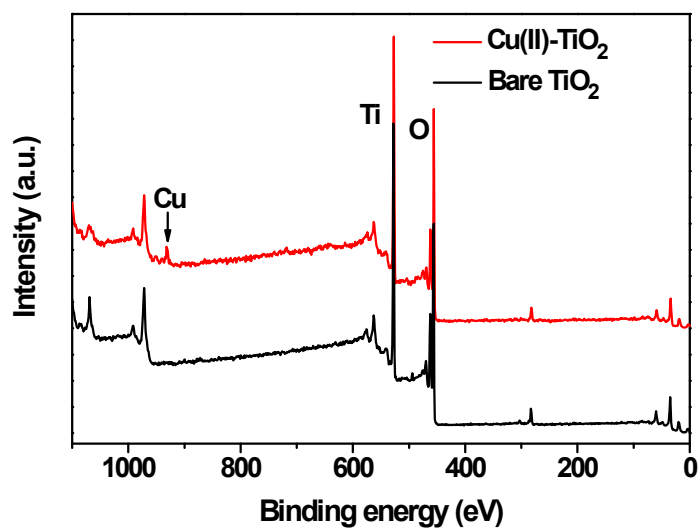

**Figure S4.** XPS spectra of bare and Cu(II) nanoclusters grafted  $\text{TiO}_2$ , which was annealed at 950 °C for 3h.

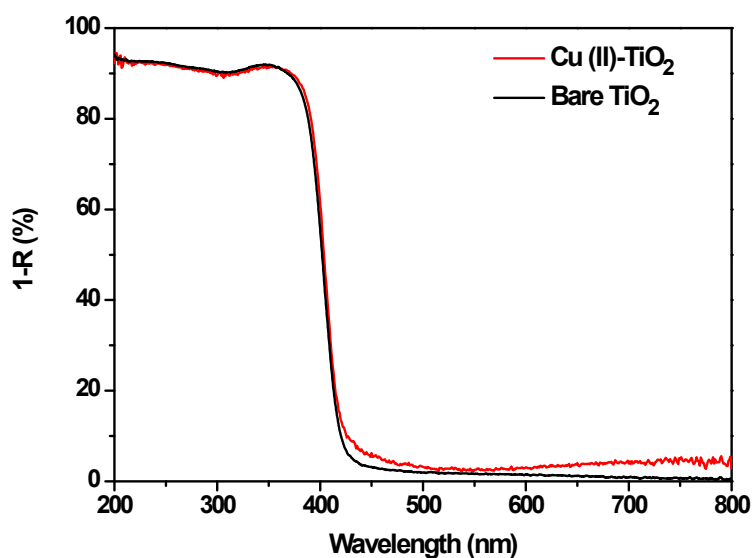

**Figure S5.** UV-Vis spectra of bare TiO<sub>2</sub> and Cu(II)-TiO<sub>2</sub>, which was annealed at 950 °C for 3h.

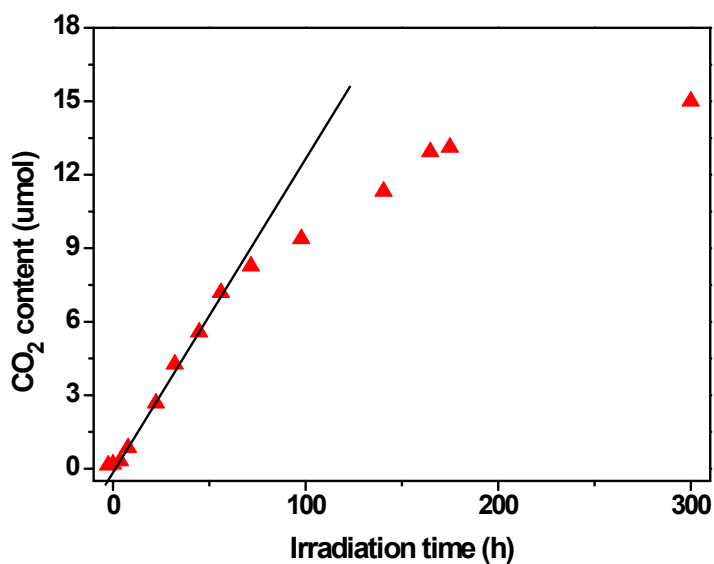

**Figure S6.** The CO<sub>2</sub> generation curve over Cu(II)-TiO<sub>2</sub> (950) sample under visible light irradiation. The CO<sub>2</sub> generation rate ( $R_{CO_2}$ ) was obtained from the slope of the CO<sub>2</sub> generation curve between the irradiation time of ca. 0 to 60 h.

The calculation of quantum efficiency (QE) was conducted using the same procedure reported in literature (*I*).

Take Cu(II)-TiO<sub>2</sub> (950) sample for example. Under the visible light irradiation, the wavelength of visible light is from 420 to 530 nm, and the light intensity is 1 mW/cm<sup>2</sup>. The irradiating area is 5.5 cm<sup>2</sup>. Therefore, the absorption rate of incident photons ( $R_p^a$ ) was determined to be  $9.78 \times 10^{14}$  quanta  $\cdot$  sec<sup>-1</sup> using the following equation:  $R_p^a = \int_{400}^{530} S \times \alpha \times I$  ( $S$  is the area of the sample,  $\alpha$  is the light absorption and  $I$  is the light intensity at each wavelength). As for CO<sub>2</sub> generation, assuming that the reaction from IPA to CO<sub>2</sub> is proceeded:  $C_3H_8O + 5H_2O + 18h^+ \rightarrow 3CO_2 + 18H^+$ , that is, six photons are required to produce one CO<sub>2</sub> molecule. The CO<sub>2</sub> generation rate ( $R_{CO_2}$ ) was obtained from the slope of the CO<sub>2</sub> generation curve in Figure S6. As shown in Figure S10,  $R_{CO_2}$  was determined to be 0.13  $\mu$ mol  $\cdot$  h<sup>-1</sup>. Thus the QE for CO<sub>2</sub> generations were calculated using the following equation:

$$QE = 6 \times \text{CO}_2 \text{ generation rate} / \text{absorption rate of incident photon}$$

$$= 6 \times (1.3 \times 10^{-1} \times 10^{-6} / 3.6 \times 10^3) \text{ mol} \cdot \text{sec}^{-1} \times$$

$$6.0 \times 10^{23} \text{ quanta} \cdot \text{mol}^{-1} / 9.78 \times 10^{14} \text{ quanta} \cdot \text{sec}^{-1}$$

$$= 13.2 \times 10^{-1} (13.2\%).$$

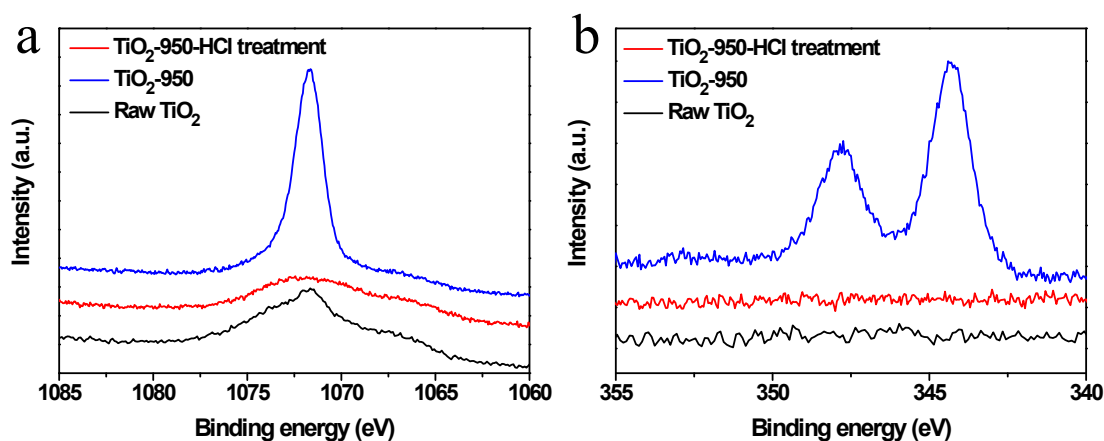

**Figure S7.** a) Na 1s and b) Ca 2p core-level spectra of raw TiO<sub>2</sub>, 950 °C annealed TiO<sub>2</sub> and HCl treated TiO<sub>2</sub> (950) samples.

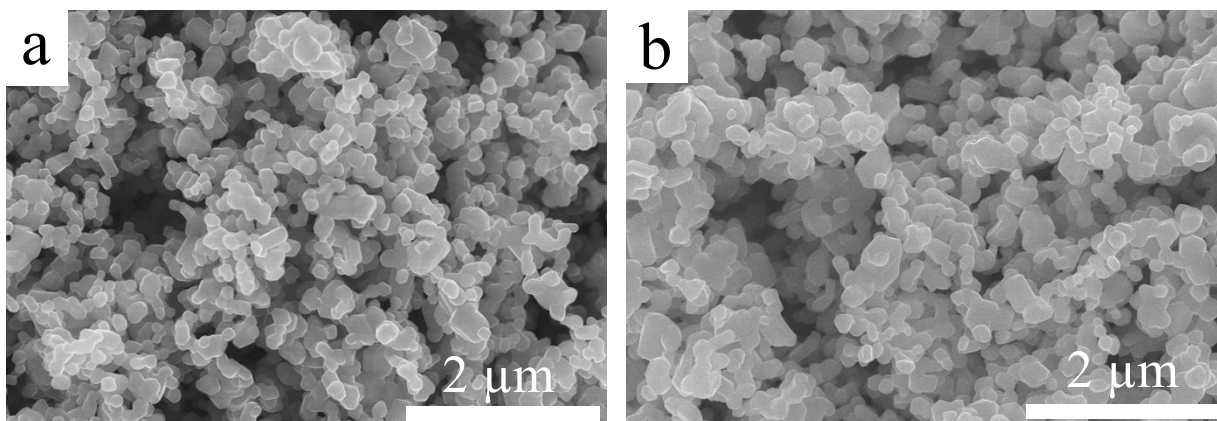

**Figure S8.** SEM images of TiO<sub>2</sub> (950) samples before and after acid treatment.

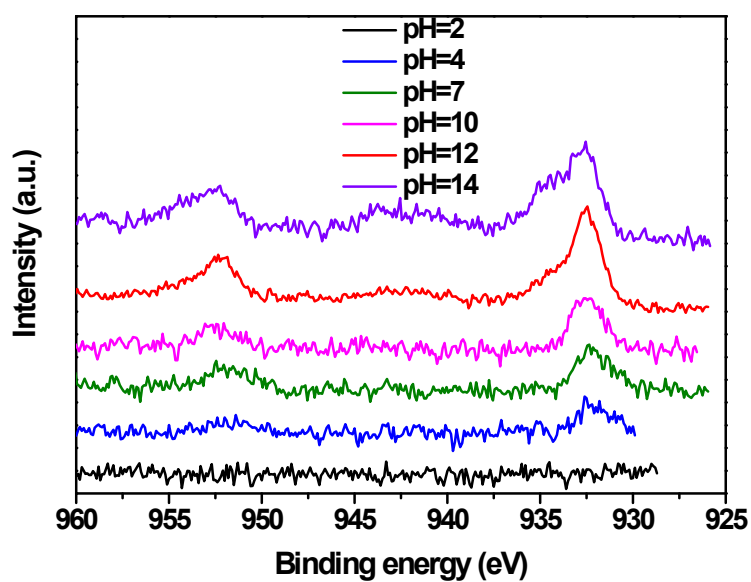

**Figure S9.** Cu 2p core-level spectra of Cu(II)-TiO<sub>2</sub> (950-HCl) samples obtained from different pH values.

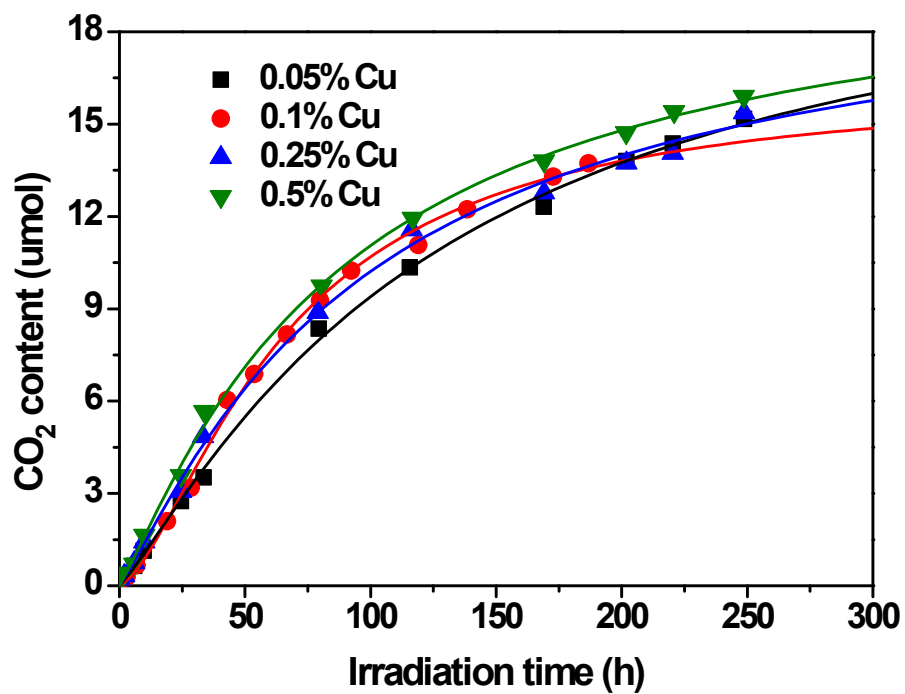

**Figure S10.** Comparative studies of CO<sub>2</sub> generation over Cu(II)-TiO<sub>2</sub> (950-HCl) with different initial amount of Cu(II) under the same conditions.

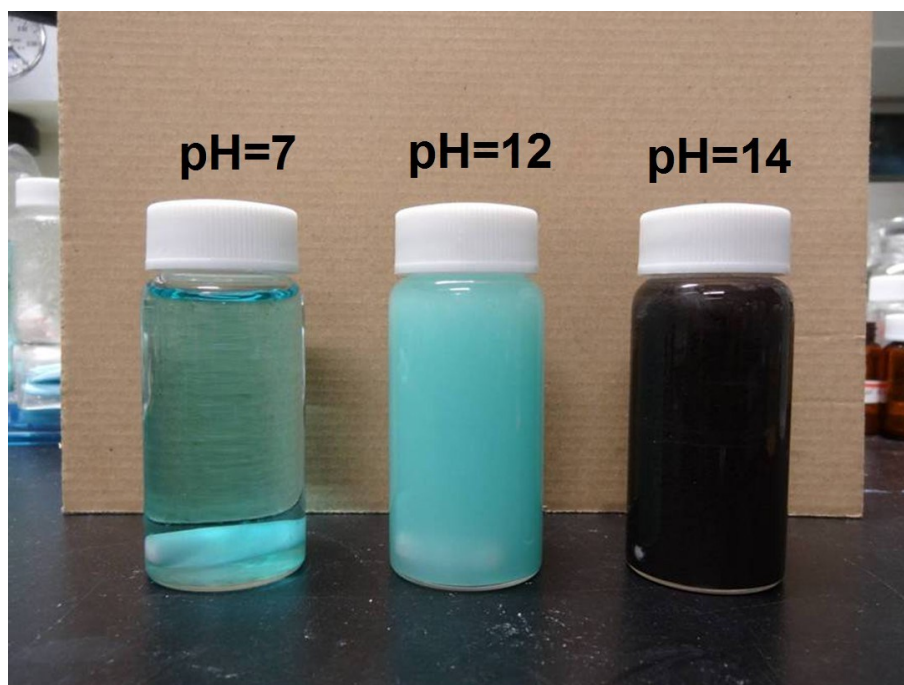

**Figure S11.** Photos for CuCl<sub>2</sub> hydrolyzed products at different pH value.



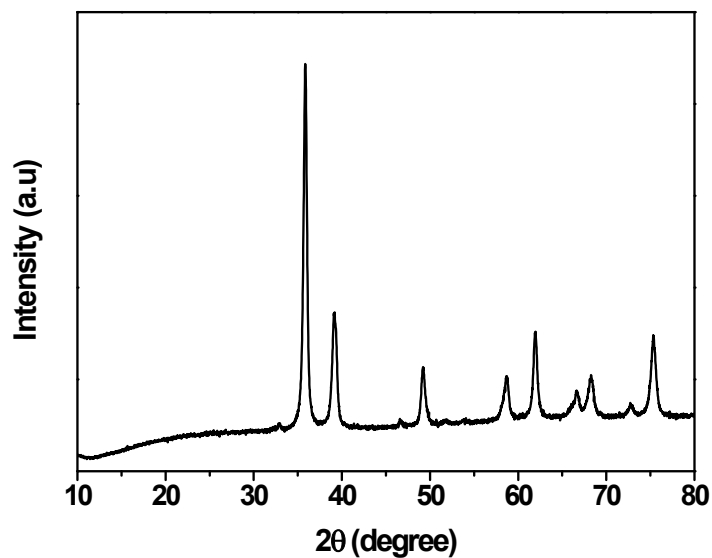

**Figure S12.** XRD pattern of  $\text{CuCl}_2$  hydrolyzed products obtained at pH 14. The result shows that the products are crystallized  $\text{CuO}$ .

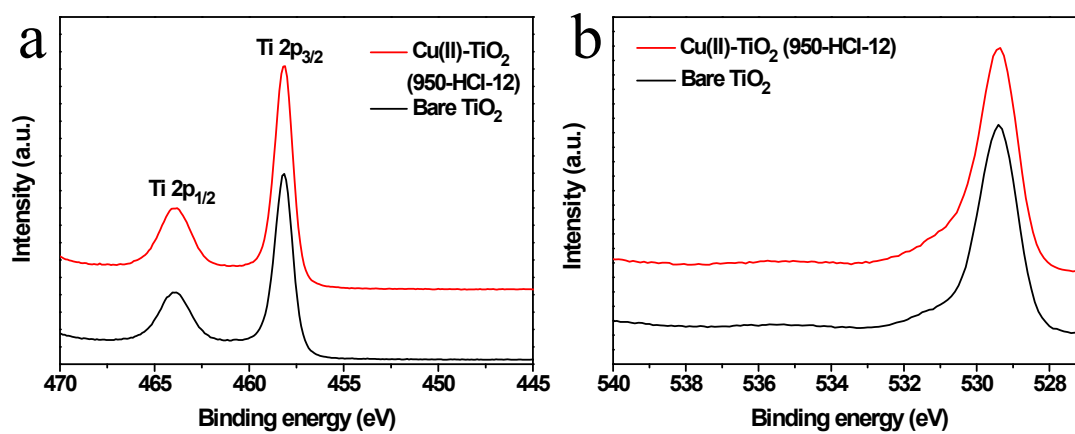

**Figure S13.** a) Ti 2p and b) Cu 2p core-level spectra of  $\text{Cu(II)-TiO}_2$  (950-HCl-12).

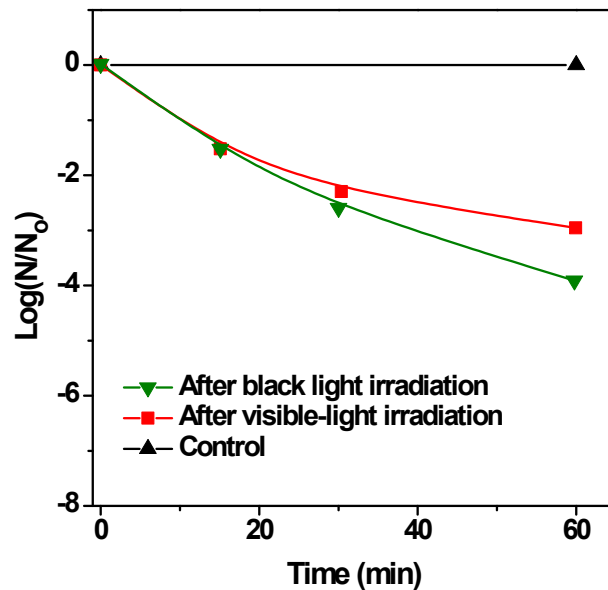

**Figure S14.** Inactivation of  $Q\beta$  bacteriophage by Cu(II)-TiO<sub>2</sub> (950-HCl-12) under dark after black light and visible-light irradiation.

#### References

- 1 H. G. Yu, H. Irie, Y. Shimodaira, Y. Hosogi, Y. Kuroda, M. Miyauchi, K. Hashimoto, *J. Phys. Chem. C* 2010, **114**, 16481–16487.
